# Supplementary material for: A Novel Identification Method for Stratospheric Gravity Waves in Nadir Viewing Satellite Observations
Source: Copernicus journal article supplement (doi:10.5194/egusphere-2025-455), 2025-02-18
Supplement: Supplementary file 1 [file egusphere-2025-455-supplement.pdf]

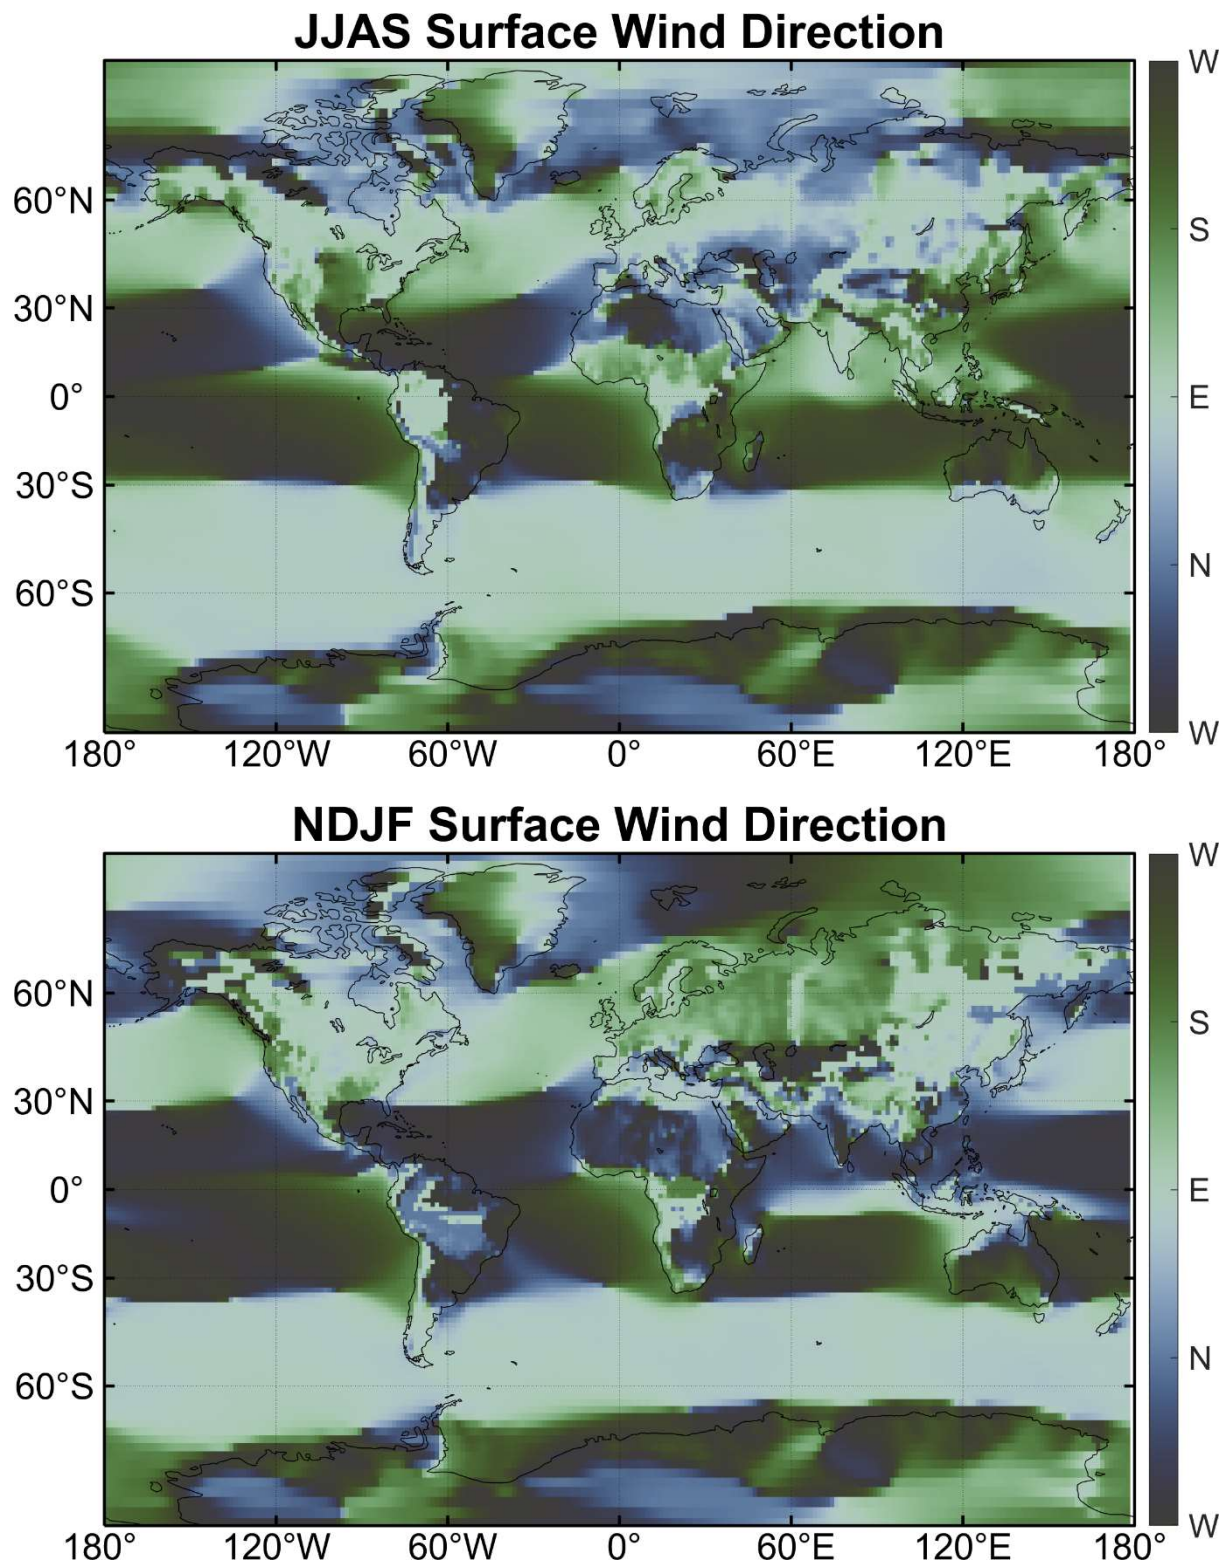

**Figure S1.** Average surface wind direction from ERA5 climatological reanalyses. The top panel has the average direction from June – September, and the bottom has the average direction from November – February.
